# Supplementary material
Source: PubMed Central journal article supplement (PMC3037288)
Supplement: NIHMS265526-supplement-Supplementary_material.pdf [file NIHMS265526-supplement-Supplementary_material.pdf]

Supplementary material for Lee et al.,  
Translationally optimal codons associate with  
aggregation-prone sites in proteins

Table S1: Odds ratio of optimal codon usage between aggregation-prone and not-aggregation-prone sites for each amino acid in *Halobacterium* sp. NRC-1.

| AA      | Optimal codon | Odds ratio |
|---------|---------------|------------|
| Ala     | GCG           | 1.43***    |
| Arg     | AGA           | 0.86       |
| Asn     | –             | –          |
| Asp     | GAC           | 0.83**     |
| Cys     | UGU           | 1.14       |
| Gln     | –             | –          |
| Glu     | –             | –          |
| Gly     | –             | –          |
| His     | –             | –          |
| Ile     | AUC           | 1.28**     |
| Leu     | UUG           | 1.28***    |
| Lys     | AAA           | 0.73*(*)   |
| Phe     | UUC           | 0.92       |
| Pro     | CCG           | 1.42       |
| Ser     | AGU           | 0.95       |
| Thr     | –             | –          |
| Tyr     | UAC           | 1.06       |
| Val     | GUG           | 1.19***    |
| Overall |               | 1.22***    |

Note.—AA: amino acid; -: no optimal codon. Significance levels: \*\*\* $P < 0.001$ ; \*\* $P < 0.01$ ; \* $P < 0.05$ . Significance levels in parentheses disappear after correction for multiple testing. We determined optimal codons based on codon usage, as follows. We calculated the adjusted effective number of codons ( $ENC'$ ) for each gene, according to the method developed by Novembre [Mol. Biol. Evol. 19:1390, 2002], which corrects for nucleotide content. We then compared the codon usage pattern between the genes showing the lowest 10% and highest 10%  $ENC'$ . We defined codons as *optimal* if they showed a statistically significant increase in frequency in the genes with low  $ENC'$ , as determined by a  $\chi^2$  test. Amino acids Asn, Gln, Glu, Gly, His, and Thr had no optimal codons according to this definition and were omitted from the analysis.

Table S2: Odds ratio of optimal codon usage between aggregation-prone and not-aggregation-prone sites and between buried and exposed sites only for genes with structural data.

| AA      | <i>E. coli</i>      |                       | <i>S. cerevisiae</i> |                       | <i>D. melanogaster</i> |                     | <i>M. musculus</i>  |                       |
|---------|---------------------|-----------------------|----------------------|-----------------------|------------------------|---------------------|---------------------|-----------------------|
|         | A/N                 | B/E                   | A/N                  | B/E                   | A/N                    | B/E                 | A/N                 | B/E                   |
| Ala     | 1.01                | 0.92                  | 0.87                 | 1.19                  | 1.21 <sup>(*)</sup>    | 1.14 <sup>(*)</sup> | —                   | —                     |
| Arg     | 1.00                | 1.08                  | 1.38                 | 0.89                  | 1.29                   | 1.02                | 1.29 <sup>(*)</sup> | 1.14 <sup>(*)</sup>   |
| Asn     | 1.21 <sup>**</sup>  | 1.34 <sup>***</sup>   | 0.99                 | 1.10                  | 1.39 <sup>**</sup>     | 1.07                | 1.16 <sup>*</sup>   | 1.20 <sup>**(*)</sup> |
| Asp     | 1.15 <sup>*</sup>   | 1.08                  | 0.91                 | 0.85                  | 1.55 <sup>***</sup>    | 0.91                | 1.15 <sup>*</sup>   | 1.09                  |
| Cys     | 0.99                | 0.85                  | 0.67                 | 1.82 <sup>(*)</sup>   | 1.02                   | 0.95                | —                   | —                     |
| Gln     | 1.00                | 1.21 <sup>**</sup>    | 1.16                 | 1.06                  | 0.85                   | 0.91                | 1.17 <sup>(*)</sup> | 1.23 <sup>**</sup>    |
| Glu     | 0.98                | 1.10                  | 1.10                 | 0.92                  | 0.93                   | 1.02                | 0.92                | 1.04                  |
| Gly     | 1.27 <sup>***</sup> | 1.07                  | 0.98                 | 1.30 <sup>(*)</sup>   | 1.06                   | 1.01                | 1.19 <sup>***</sup> | 1.08                  |
| His     | 1.28 <sup>**</sup>  | 1.00                  | 1.22                 | 0.85                  | 1.26                   | 0.75 <sup>(*)</sup> | 1.21 <sup>*</sup>   | 1.05                  |
| Ile     | 1.14 <sup>(*)</sup> | 0.99                  | 0.77 <sup>(*)</sup>  | 1.14                  | 0.94                   | 1.09                | 1.14 <sup>(*)</sup> | 1.09                  |
| Leu     | 0.84 <sup>***</sup> | 1.14 <sup>**(*)</sup> | 1.03                 | 1.10                  | 1.03                   | 1.08                | 0.84 <sup>***</sup> | 1.02                  |
| Lys     | —                   | —                     | 0.75 <sup>(*)</sup>  | 1.29 <sup>(*)</sup>   | 0.72 <sup>(*)</sup>    | 0.91                | 1.17 <sup>*</sup>   | 1.06                  |
| Phe     | 1.02                | 0.99                  | 1.04                 | 1.18                  | 0.89                   | 1.03                | 1.14 <sup>(*)</sup> | 1.07                  |
| Pro     | 0.92                | 1.07                  | 0.98                 | 1.24 <sup>(*)</sup>   | 0.58                   | 1.10                | 0.71                | 1.01                  |
| Ser     | 1.26 <sup>***</sup> | 1.42 <sup>***</sup>   | 1.22 <sup>(*)</sup>  | 1.13                  | 0.95                   | 1.10                | 1.16 <sup>(*)</sup> | 1.22 <sup>***</sup>   |
| Thr     | 1.26 <sup>***</sup> | 1.22 <sup>***</sup>   | 0.99                 | 1.11                  | 1.24 <sup>(*)</sup>    | 1.09                | 1.26 <sup>***</sup> | 1.14 <sup>**</sup>    |
| Tyr     | 1.23 <sup>**</sup>  | 0.85 <sup>*</sup>     | 1.07                 | 0.90                  | 1.30 <sup>(*)</sup>    | 0.94                | —                   | —                     |
| Val     | 0.85 <sup>***</sup> | 0.88 <sup>(*)</sup>   | 1.29 <sup>(**)</sup> | 1.16                  | 1.05                   | 1.23 <sup>(*)</sup> | 0.96                | 1.07                  |
| Overall | 1.07 <sup>***</sup> | 1.08 <sup>***</sup>   | 1.02                 | 1.10 <sup>**(*)</sup> | 1.09 <sup>**(*)</sup>  | 1.04                | 1.09 <sup>***</sup> | 1.09 <sup>***</sup>   |

Note.—AA: amino acid; A/N: odds ratio between aggregation-prone and not-aggregation-prone sites; B/E: odds ratio between buried and exposed sites; -: no optimal codon. Significance levels: \*\*\* $P < 0.001$ ; \*\* $P < 0.01$ ; \* $P < 0.05$ . Significance levels in parentheses disappear after correction for multiple testing.

Table S3: Odds ratio of optimal codon usage between aggregation-prone and not-aggregation-prone sites for each amino acid (aggregation propensity cutoff = 0)

| AA      | <i>E. coli</i> | <i>S. cerevisiae</i> | <i>D. melanogaster</i> | <i>M. musculus</i> |
|---------|----------------|----------------------|------------------------|--------------------|
| Asn     | 1.13***        | 1.05***              | 1.23***                | 1.04***            |
| Ala     | 1.02           | 1.03*                | 1.33***                | —                  |
| Arg     | 1.12***        | 1.01                 | 1.26***                | 1.18***            |
| Asp     | 1.07**(*)      | 1.00                 | 1.24***                | 1.11***            |
| Cys     | 0.92           | 1.04                 | 1.25***                | —                  |
| Gln     | 1.10***        | 1.04(*)              | 0.97                   | 1.04***            |
| Glu     | 1.06**         | 1.03(*)              | 1.03                   | 0.98*              |
| Gly     | 1.20***        | 1.11***              | 1.20***                | 1.17***            |
| His     | 1.20***        | 1.03                 | 1.32***                | 1.03*              |
| Ile     | 1.06**         | 1.06***              | 1.14***                | 1.11***            |
| Leu     | 0.98           | 1.01                 | 1.04**                 | 0.92***            |
| Lys     | —              | 0.9***               | 0.94**                 | 0.97**             |
| Phe     | 0.98           | 1.00                 | 1.09***                | 1.09***            |
| Pro     | 1.06           | 1.01                 | 1.44***                | 0.98               |
| Ser     | 1.10***        | 1.08***              | 1.17***                | 1.15***            |
| Thr     | 1.35***        | 1.06***              | 1.44***                | 1.13***            |
| Tyr     | 1.20***        | 1.04(*)              | 1.29***                | —                  |
| Val     | 0.85***        | 1.1***               | 1.08***                | 0.99               |
| Overall | 1.07***        | 1.03***              | 1.17***                | 1.05***            |

Note.—AA: amino acid; -: no optimal codon. Significance levels: \*\*\* $P < 0.001$ ; \*\* $P < 0.01$ ; \* $P < 0.05$ . Significance levels in parentheses disappear after correction for multiple testing.

Table S4: Odds ratio of optimal codon usage between exposed-aggregation-prone and exposed-not-aggregation-prone sites, between buried-aggregation-prone and buried-not-aggregation-prone sites, and between buried-aggregation-prone and exposed-not-aggregation-prone sites for each amino acid (aggregation propensity cutoff = 0)

| AA      | <i>E. coli</i> |           |           | <i>S. cerevisiae</i> |          |          | <i>D. melanogaster</i> |           |          | <i>M. musculus</i> |           |          |
|---------|----------------|-----------|-----------|----------------------|----------|----------|------------------------|-----------|----------|--------------------|-----------|----------|
|         | EA-EN          | BA-BN     | EA-BN     | EA-EN                | BA-BN    | EA-BN    | EA-EN                  | BA-BN     | EA-BN    | EA-EN              | BA-BN     | EA-BN    |
| Ala     | 1.07           | 1.02      | 1.13      | 1.15                 | 0.97     | 0.77     | 1.15                   | 1.12      | 1.01     | —                  | —         | —        |
| Arg     | 1.04           | 1.14      | 0.97      | 1.25                 | 1.20     | 1.24     | 1.50***                | 1.10      | 1.38*(*) | 1.26               | 1.07      | 1.02     |
| Asn     | 1.22*(*)       | 1.05      | 0.85      | 1.09                 | 1.28     | 1.03     | 0.99                   | 1.67**(*) | 1.20     | 1.33*(*)           | 0.96      | 1.16     |
| Asp     | 1.05           | 1.16      | 1.06      | 0.95                 | 0.99     | 1.07     | 1.29**                 | 1.64**(*) | 1.67***  | 1.21               | 1.07      | 0.98     |
| Cys     | 3.14           | 0.88      | 0.92      | 1.33                 | 0.70     | 0.08*(*) | 0.94                   | 1.29      | 1.40     | 1.23               | —         | —        |
| Gln     | 1.08           | 1.00      | 0.89      | 1.23                 | 1.30     | 1.25     | 0.92                   | 1.14      | 1.24     | 0.99               | 1.04      | 0.80(*)  |
| Glu     | 1.10           | 1.03      | 1.02      | 1.04                 | 1.30     | 1.16     | 0.93                   | 0.82      | 0.96     | 0.88               | 0.90(*)   | 0.88     |
| Gly     | 1.25**(*)      | 1.28**(*) | 1.22*(*)  | 1.29                 | 1.19     | 0.91     | 1.06                   | 1.20      | 1.16     | 1.08               | 1.05      | 1.18*(*) |
| His     | 1.15           | 1.60***   | 1.32*(*)  | 1.64*(*)             | 0.99     | 1.86*(*) | 1.02                   | 1.58*(*)  | 2.19***  | 1.03               | 1.08      | 1.05     |
| Ile     | 1.07           | 1.10      | 1.21(*)   | 0.88                 | 0.82     | 0.86     | 1.05                   | 1.03      | 0.94     | 1.20               | 1.23      | 1.06     |
| Leu     | 0.92           | 0.88**(*) | 0.80**(*) | 0.90                 | 0.99     | 0.83     | 0.94                   | 0.99      | 0.86     | 1.08               | 0.88      | 0.90*(*) |
| Lys     | —              | —         | —         | 0.84                 | 0.76     | 0.63*(*) | 0.83*(*)               | 0.73      | 0.95     | 0.80               | 0.93      | 1.23*(*) |
| Phe     | 0.76           | 0.97      | 0.92      | 1.23                 | 0.93     | 0.93     | 1.10                   | 1.05      | 0.96     | 1.05               | 0.98      | 1.02     |
| Pro     | 1.10           | 1.10      | 1.09      | 1.31                 | 1.22     | 1.15     | 1.61*                  | 1.24      | 1.22     | 1.41               | 1.09      | 0.85     |
| Ser     | 1.03           | 1.24**    | 0.78*(*)  | 1.10                 | 1.42(**) | 1.14     | 1.01                   | 1.01      | 0.98     | 1.19               | 1.16*(*)  | 1.08     |
| Thr     | 1.36***        | 1.36***   | 1.11      | 1.39*(*)             | 1.04     | 1.14     | 1.34*(*)               | 1.45*(*)  | 1.35*(*) | 1.36*(*)           | 1.27**(*) | 1.10     |
| Tyr     | 1.06           | 1.23*     | 1.35*(*)  | 1.26                 | 1.17     | 1.23     | 1.45                   | 1.23      | 1.37     | 1.27               | —         | —        |
| Val     | 0.91           | 0.79***   | 0.91      | 0.90                 | 1.24*(*) | 1.00     | 1.20                   | 1.08      | 0.98     | 1.39*(*)           | 1.02      | 0.89     |
| Overall | 1.09***        | 1.03      | 1.00      | 1.07                 | 1.07*(*) | 0.98     | 1.11**(*)              | 1.13***   | 1.13***  | 1.17***            | 1.03      | 0.95(**) |

Note.—AA: amino acid; EA: exposed and aggregation-prone sites; BN: buried and not-aggregation-prone sites; BA: buried and aggregation-prone sites; EN: exposed and not-aggregation-prone sites; —: no optimal codon. Significance levels: \*\*\* $P < 0.001$ ; \*\* $P < 0.01$ ; \* $P < 0.05$ . Significance levels in parentheses disappear after correction for multiple testing.

Table S5: Odds ratio of optimal codon usage between sites that are sensitive ( $S_i > 0$ ) and not sensitive ( $S_i \leq 0$ ) to amino-acid substitutions. Analysis was carried out for 845 genes in fly only.

| AA      | Odds ratio           |
|---------|----------------------|
| Ala     | 1.30***              |
| Arg     | 1.16 <sup>*(*)</sup> |
| Asn     | 1.10                 |
| Asp     | 1.10                 |
| Cys     | 0.77 <sup>(*)</sup>  |
| Gln     | 1.02                 |
| Glu     | 0.97                 |
| Gly     | 1.01                 |
| His     | 1.06                 |
| Ile     | 0.98                 |
| Leu     | 1.00                 |
| Lys     | 0.87 <sup>*(*)</sup> |
| Phe     | 0.86 <sup>(*)</sup>  |
| Pro     | 1.26***              |
| Ser     | 1.01                 |
| Thr     | 0.85 <sup>*(*)</sup> |
| Tyr     | 0.84 <sup>(*)</sup>  |
| Val     | 1.03                 |
| Overall | 1.03 <sup>(*)</sup>  |

Note.—AA: amino acid. Significance levels: \*\*\* $P < 0.001$ ; \*\* $P < 0.01$ ; \* $P < 0.05$ . Significance levels in parentheses disappear after correction for multiple testing.
